# Supplementary material for: An Electrochemical Sensor Based on Gold and Bismuth Bimetallic Nanoparticles Decorated L-Cysteine Functionalized Graphene Oxide Nanocomposites for Sensitive Detection of Iron Ions in Water Samples
Source: MDPI journal article supplement (doi:10.3390/nano11092386), 2021-09-14
Supplement: s1 [file s1]

*-Supporting information-*

# **An Electrochemical Sensor Based on Gold and Bismuth Bimetallic Nanoparticles Decorated L-Cysteine Functionalized Graphene Oxide Nanocomposites for Sensitive Detection of Iron Ions in Water Samples**

Na Zhou <sup>1</sup>, Jing Li <sup>2</sup>, Shaoxia Wang <sup>2</sup>, Xuming Zhuang <sup>2,\*</sup>, Shouqing Ni <sup>3</sup>, Feng Luan <sup>2</sup>, Xuran Wu <sup>2</sup> and Shunyang Yu <sup>1,\*</sup>

<sup>1</sup> Shandong Key Laboratory of Coastal Environmental Processes, Yantai Institute of Coastal Zone Research, Chinese Academy of Sciences, Yantai 264003, China; nzhou@yic.ac.cn

<sup>2</sup> College of Chemistry and Chemical Engineering, Yantai University, Yantai 264005, China; lj508837@163.com (J.L.); 18865557620@163.com (S.W.); fluan@sina.com (F.L.); ytdxwxr@126.com (X.W.)

<sup>3</sup> Shandong Provincial Key Laboratory of Water Pollution Control and Resource Reuse, School of Environmental Science and Engineering, Shandong University, Qingdao 266237, China; sqni@sdu.edu.cn

\* Correspondence: xmzhuang@iccas.ac.cn (X.Z.); syyu@yic.ac.cn (S.Y.)

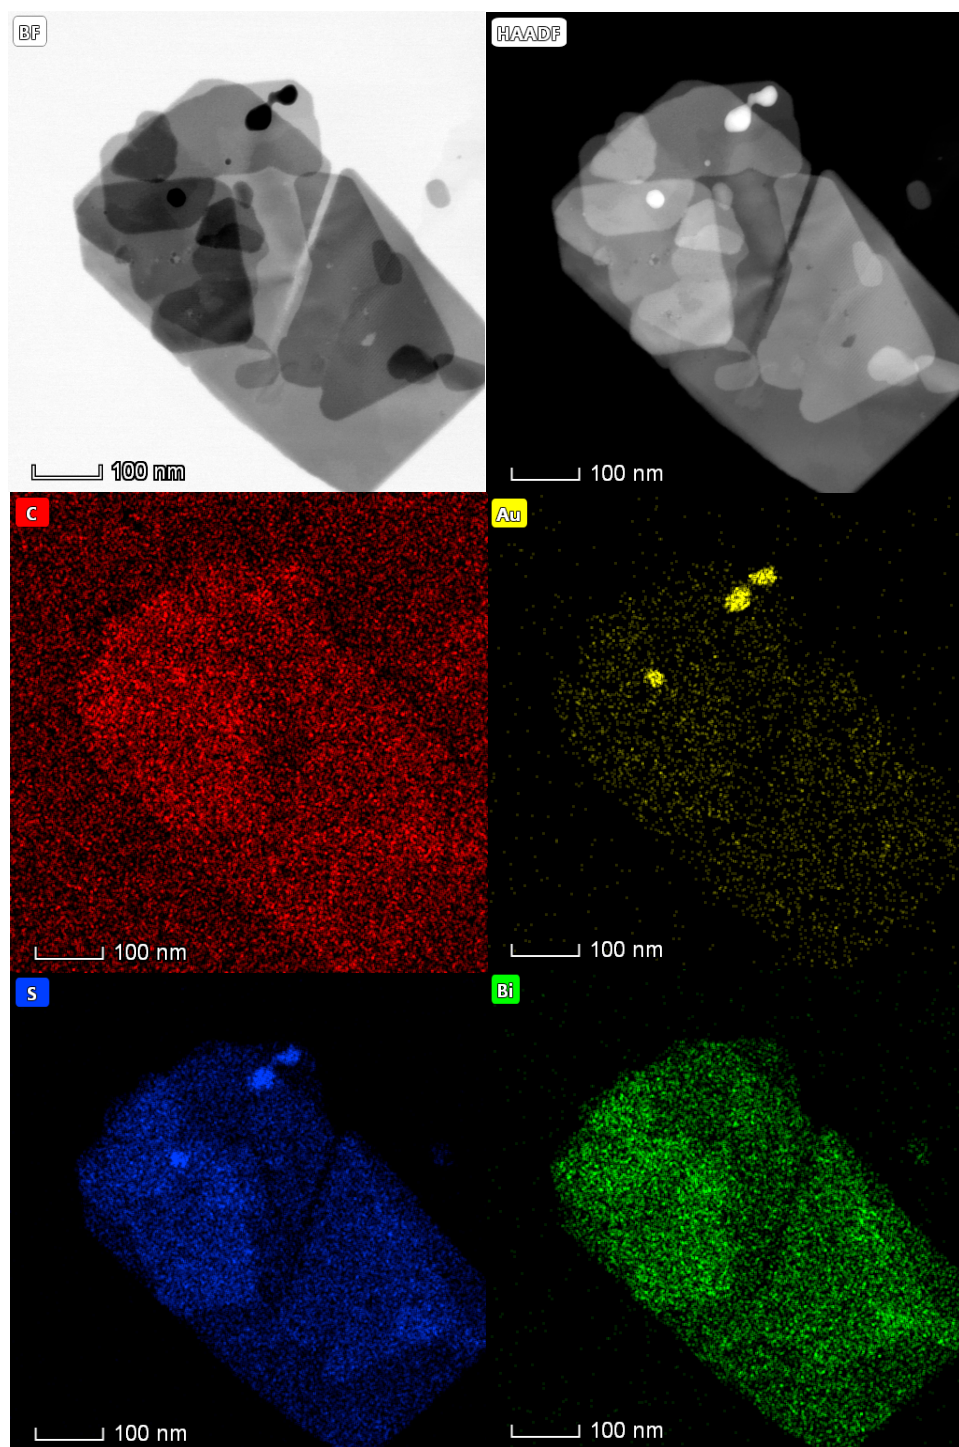

**Figure S1.** Elemental mapping of C, Au, S, and Bi element distribution, respectively.

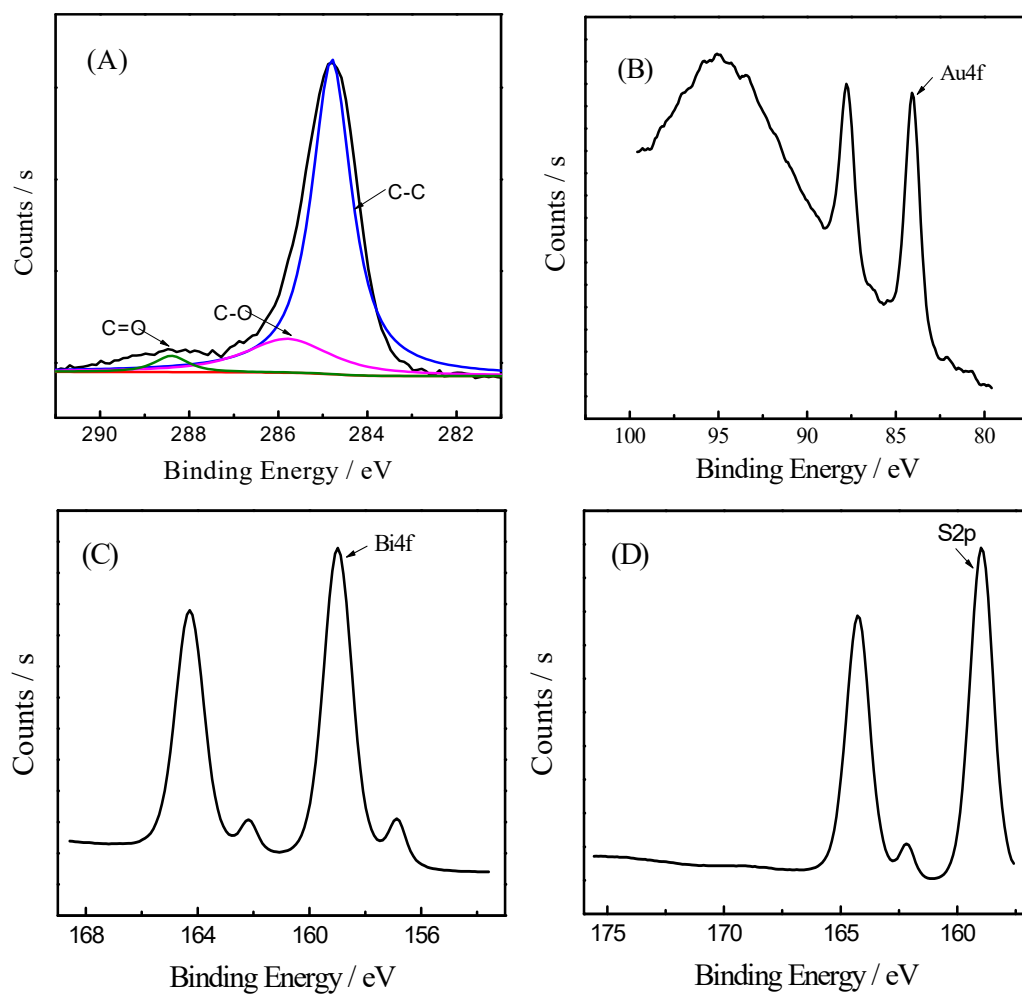

**Figure S2.** XPS survey spectrum of (A) C1s (B) Au4f (C) Bi4f and (D) S2p.

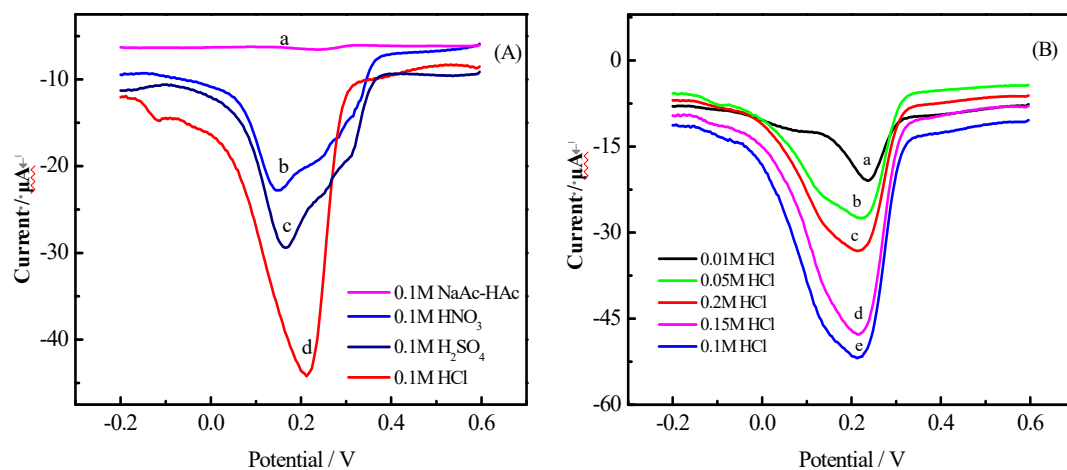

**Figure S3.** (A) SWV measurements of 5  $\mu\text{M}$  Fe(III) at Au-BiNPs/SH-GO/GCE in different electrolytes. 0.1 M HAc-NaAc (a), 0.1 M  $\text{HNO}_3$  (b), 0.1 M  $\text{H}_2\text{SO}_4$  (c) and 0.1 M HCl (d); (B) Effect of the concentration of HCl solution on the peak of Fe(III) at Au-BiNPs/SH-GO/GCE.
